# Supplementary material for: Betaine-Based Deep Eutectic Solvent as a New Media for Laccase-Catalyzed Template-Guided Polymerization/Copolymerization of Aniline and 3-Aminobenzoic Acid
Source: MDPI journal article supplement (doi:10.3390/ijms231911409), 2022-09-27
Supplement: s1 [file s1]

## Supplementary Materials

### Betaine-Based Deep Eutectic Solvent as a New Media for Laccase-Catalyzed Template-Guided Polymerization/Copolymerization of Aniline and 3-Aminobenzoic Acid

Irina Vasil'eva, Olga Morozova, Galina Shumakovich and Alexander Yaropolov \*

A. N. Bach Institute of Biochemistry, Research Center of Biotechnology of the Russian Academy of Sciences, Leninsky Ave. 33, bld. 2, 119071 Moscow, Russia

\* Correspondence: yaropolov@inbi.ras.ru, alexander-yaropolov52@yandex.ru (A.Y.)

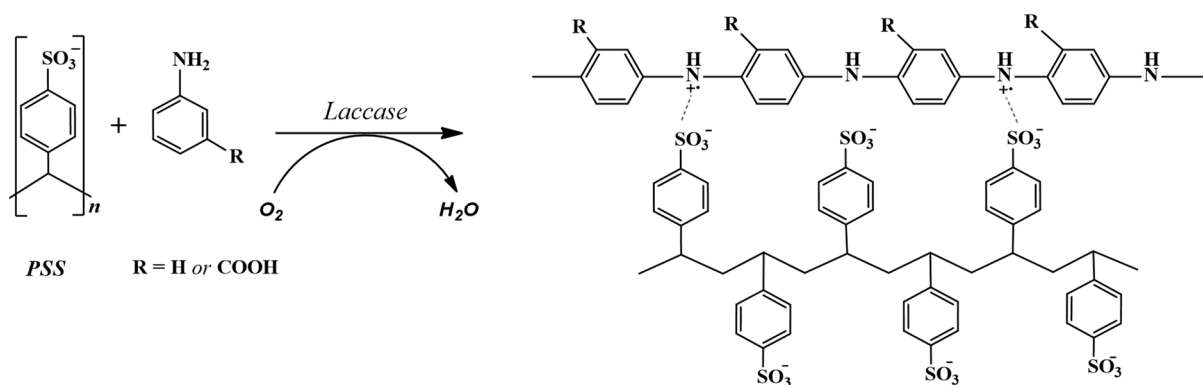

**Figure S1.** Scheme of the enzymatic polymerization/copolymerization of ANI and 3ABA on a PSS template
